# Supplementary material for: High-Cell-Density Yeast Oil Production with Diluted Substrates Imitating Microalgae Hydrolysate Using a Membrane Bioreactor
Source: MDPI journal article supplement (doi:10.3390/en16041757), 2023-02-10
Supplement: s1 [file s1]

## Supplementary materials

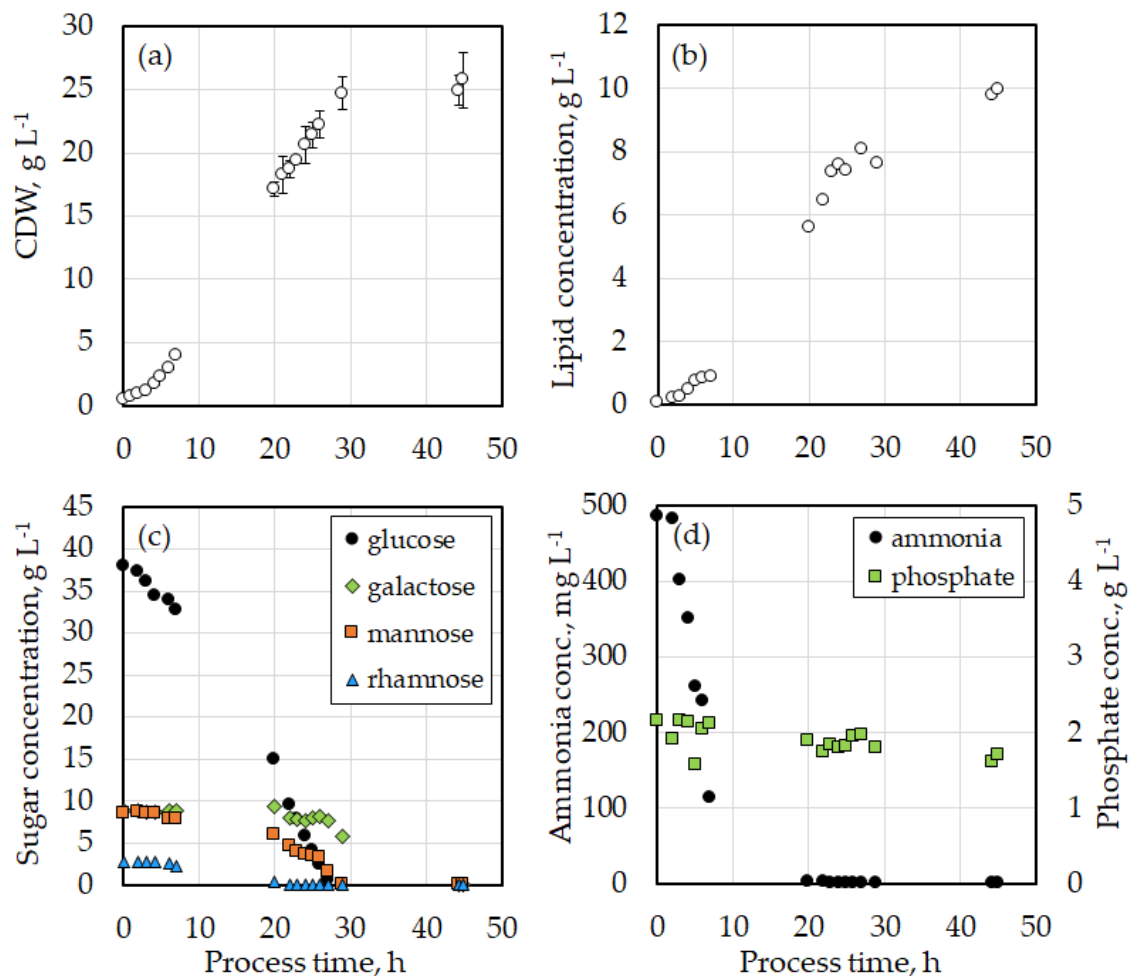

**Figure S1.** A batch process with *C. oleaginosus* in a stirred-tank bioreactor on 3 L scale to check for possible substrate preferences. A defined medium was used with a mixture of sugars, which are likely to be present in a microalgal biomass hydrolysate. The medium contained per one liter of water: 38.0 g glucose; 10.0 g mannose; 10.0 g galactose; 3.0 g rhamnose; 2.45 g (NH<sub>4</sub>)<sub>2</sub>SO<sub>4</sub>; 2.40 g KH<sub>2</sub>PO<sub>4</sub>; 0.91 g NaHPO<sub>4</sub>; 1.0 g MgSO<sub>4</sub> · 7 H<sub>2</sub>O; 1 mL antifoam; 10 mL solution of trace elements; 2.5 mL solution of vitamins; 1 mL solution of kanamycin A; 1 mL solution of tetracycline (See Subsection 2.1 for stock solution details). Presented are: (a) cell dry weight; (b) lipid concentration; (c) sugar concentrations; (d) concentration of ammonia on the primary vertical axis and of phosphate on the secondary axis.

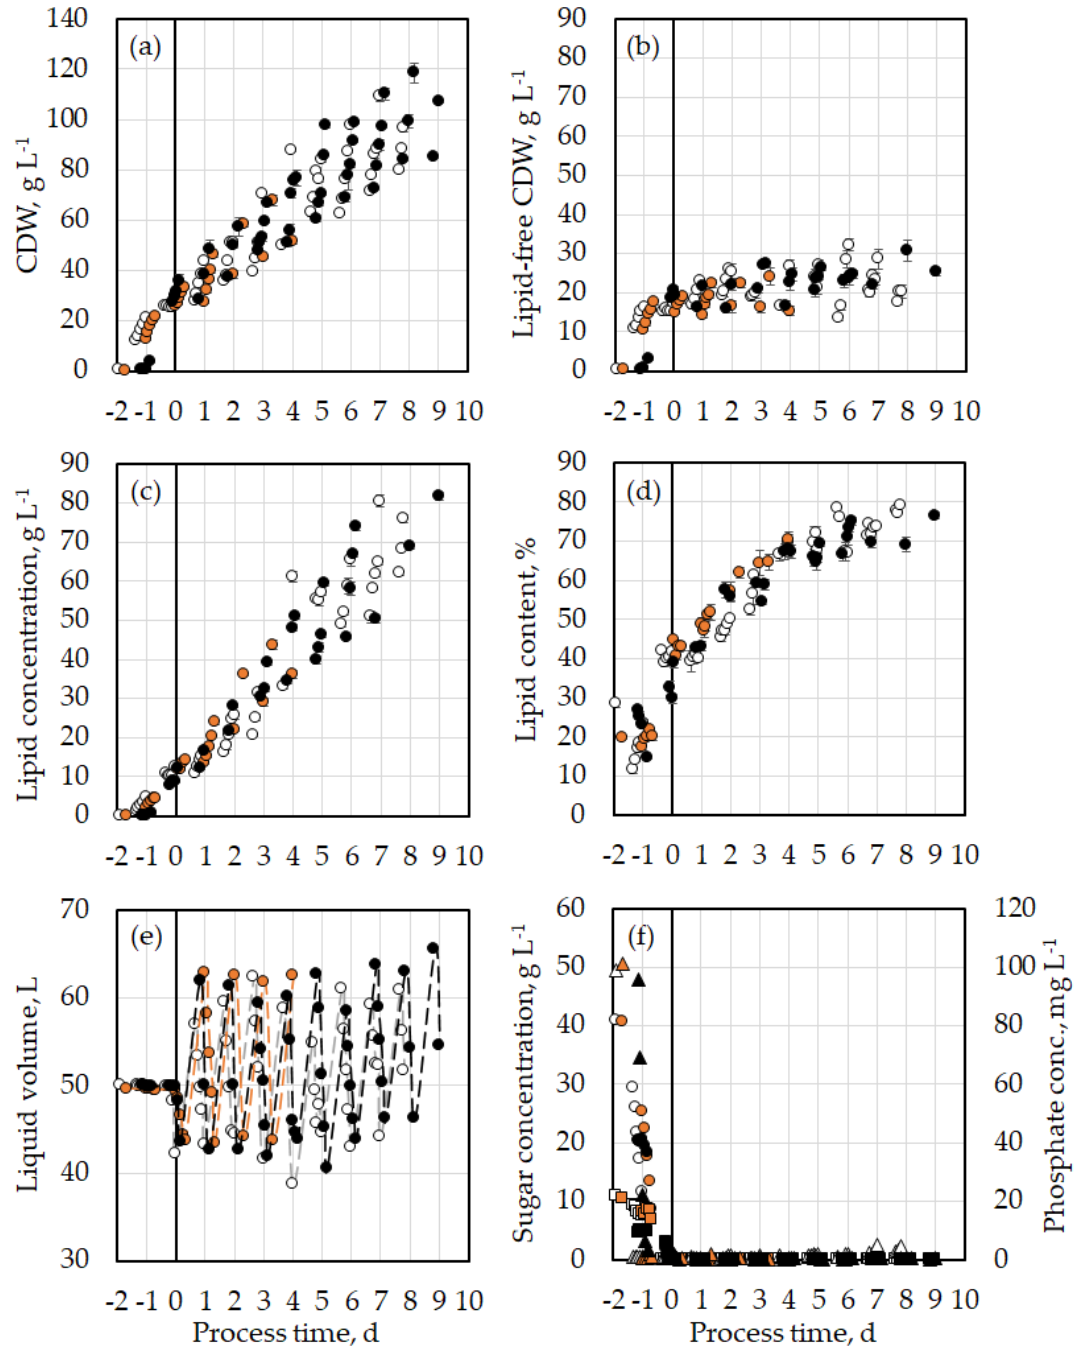

**Figure S2.** Experimental results from Figure 2 with CDW and lipid amounts presented as concentrations ( $\text{g L}^{-1}$ ). The results of Experiment 1 are marked in orange (●), those of Experiment 2 in white (○), and those of Experiment 3 in black (●). The error bars show the standard deviation of the triplicate measurements. Presented are: (a) cell dry weight; (b) lipid-free cell dry weight; (c) lipid concentration; (d) lipid content of the yeast cells; (e) liquid volume inside the MBR; (f) concentrations of glucose (●) and mannose (■) on the primary vertical axis and phosphate (▲) concentration on the secondary vertical axis with the corresponding marker color of each experiment.
