# Supplementary material for: High-Cell-Density Yeast Oil Production with Diluted Substrates Imitating Microalgae Hydrolysate Using a Membrane Bioreactor
Source: MDPI journal article supplement (doi:10.3390/en16041757), 2023-02-10
Supplement: s1 [file s1]

Archive with 1 entries (1 files):
- energies-2201604-supplementary.pdf
